# Supplementary material
Source: HighWire-hosted journal article supplement (http://www.jrheum.org/highwire/filestream/35504/field_highwire_adjunct_files/0/180972DataSuppl.pdf)
Supplement: 180972DataSuppl.pdf [file 180972DataSuppl.pdf]

## ONLINE SUPPLEMENTARY DATA

**Supplementary Table 1.** List of opioids considered when determining the prevalence of chronic opioid use

---

### Opioids

Acetaminophen/Caffeine/Dihydrocodeine Bitartrate

Acetaminophen/Codeine Phosphate

Acetaminophen/Hydrocodone Bitartrate

Acetaminophen/Oxycodone Hydrochloride

Acetaminophen/Pentazocine Hydrochloride

Acetaminophen/Propoxyphene Hydrochloride

Acetaminophen/Propoxyphene Napsylate

Acetaminophen/Tramadol Hydrochloride

Alfentanil Hydrochloride

APAP/Butalbital/Caff/Codeine Phos

APAP/Hydrocod Bit;Medical Food

ASA/Oxycodone HCl/Oxycodone Terephthalate

Aspirin/Butalbital/Caffeine/Codeine Phosphate

Aspirin/Caffeine/Dihydrocodeine Bitartrate

Aspirin/Carisoprodol/Codeine Phosphate

Aspirin/Oxycodone Hydrochloride

Buprenorphine

Buprenorphine Hydrochloride

Butorphanol Tartrate

Codeine Phosphate

Codeine Sulfate

Dextrose/Morphine Sulfate

Fentanyl

Fentanyl Citrate

Hydrocodone Bitartrate

Hydrocodone Bitartrate/Ibuprofen

Hydromorphone Hydrochloride

Ibuprofen/Oxycodone Hydrochloride  
Levorphanol Tartrate  
Meperidine HCl/Promethazine HCl  
Meperidine Hydrochloride  
Methadone Hydrochloride  
Morphine Sulfate  
Morphine Sulfate/Naltrexone Hydrochloride  
Nalbuphine Hydrochloride  
Naloxone Hydrochloride/Pentazocine Hydrochloride  
Oxycodone  
Oxycodone Hydrochloride  
Oxymorphone Hydrochloride  
Pentazocine Lactate  
Propoxyphene Hydrochloride  
Propoxyphene Napsylate  
Remifentanil Hydrochloride  
Sufentanil Citrate  
Tapentadol Hydrochloride  
Tramadol Hydrochloride

---

**Supplementary Table 2.** List of ICD codes used to identify comorbidities

| <b>Conditions</b>          | <b>ICD-9 codes</b>                                                                                  | <b>ICD-10 codes</b>                                                                                                                                                                      |
|----------------------------|-----------------------------------------------------------------------------------------------------|------------------------------------------------------------------------------------------------------------------------------------------------------------------------------------------|
| Depression                 | 296.20-.25, 296.5, 296.30-<br>296.35, 296.6, 296.82,<br>296.90,300.4, 309.0, 309.1 &<br>309.28, 311 | F31.3-F31.6, F32.0-32.9, F33.0-<br>33.3, F33.8, F33.9, F34.1, F34.8,<br>F34.9, F38.0, F38.1, F38.8, F39,<br>F41.2, F99<br>F40.00, F40.01, 40.02, F40.10,<br>F40.11, F41.0, F41.1, F41.3, |
| Anxiety                    | 300.0, 300.01, 300.02, 300.09,<br>300.21 300.22, 300.23, 300.3,<br>309.24, 309.81                   | F41.8, F41.9, F42.2, F42.3,<br>F42.4, F42.8, F42.9, F43.22,<br>F43.10, F43.12                                                                                                            |
| Rheumatoid arthritis       | 7140-7142                                                                                           | M05.0X, M05.2X-M05.9X,<br>M06.X                                                                                                                                                          |
| Psoriasis                  | 6961, 6968                                                                                          | L400, L401, L403, L408, L409,<br>L448                                                                                                                                                    |
| Psoriatic arthritis        | 6960                                                                                                | L4050-L4053, L4059                                                                                                                                                                       |
| IBD                        | 555-556                                                                                             | K50.X, K51.X                                                                                                                                                                             |
| Opioid Dependence or abuse | 30400, 30401, 30402, 30403,<br>30550, 30551, 30552, 30553                                           | F1110, F1112, F1114, F1115,<br>F1118, F1119, F1120, F1121,<br>F1122, F1123, F1124, F1125,<br>F1128, F1129                                                                                |

**Supplementary Figure 1.** Cumulative supply of opioids during the follow-up period among patients with (A) Truven commercial and (B) Truven Medicaid claims (chronic opioid users only)

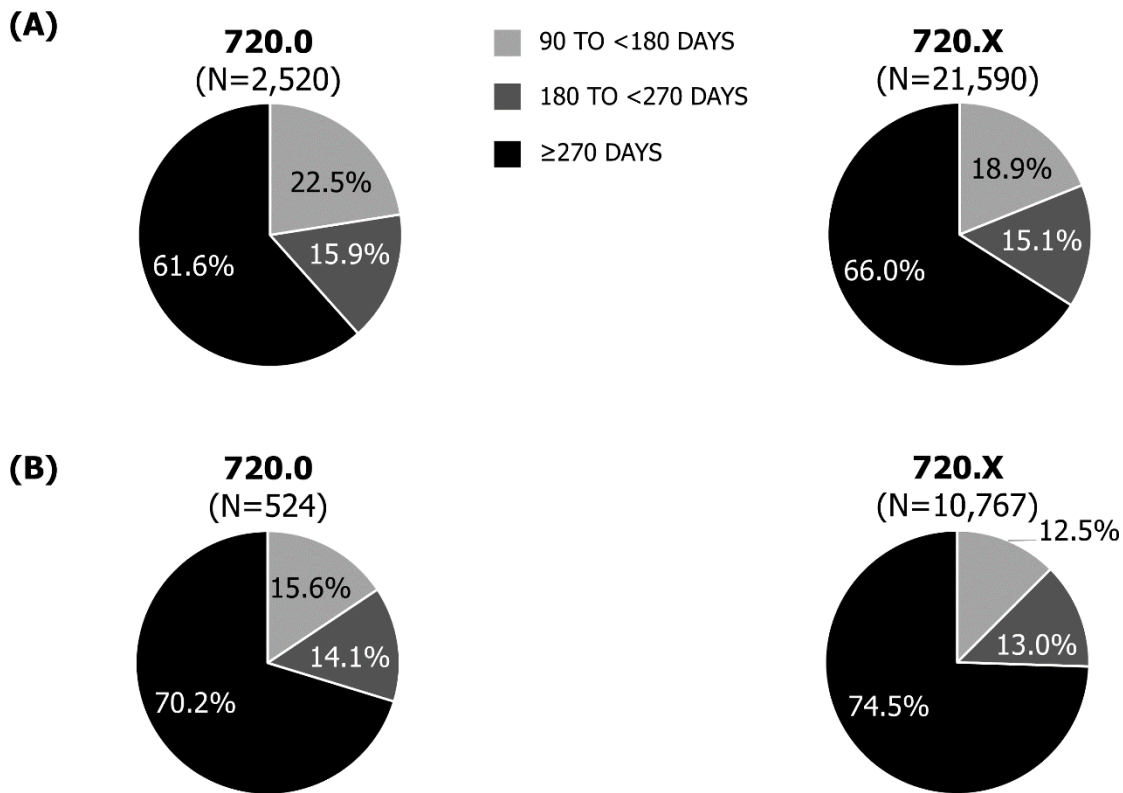

‘Concomitant use’ was defined as a claim for the drug in question within  $\pm 30$  days of an opioid claim.

NSAID: Non-steroidal anti-inflammatory drug; TNF: tumor necrosis factor.

**Supplementary Figure 2.** Concomitant medication use among patients with (A) Truven commercial and (B) Truven Medicaid claims (chronic opioid users only)

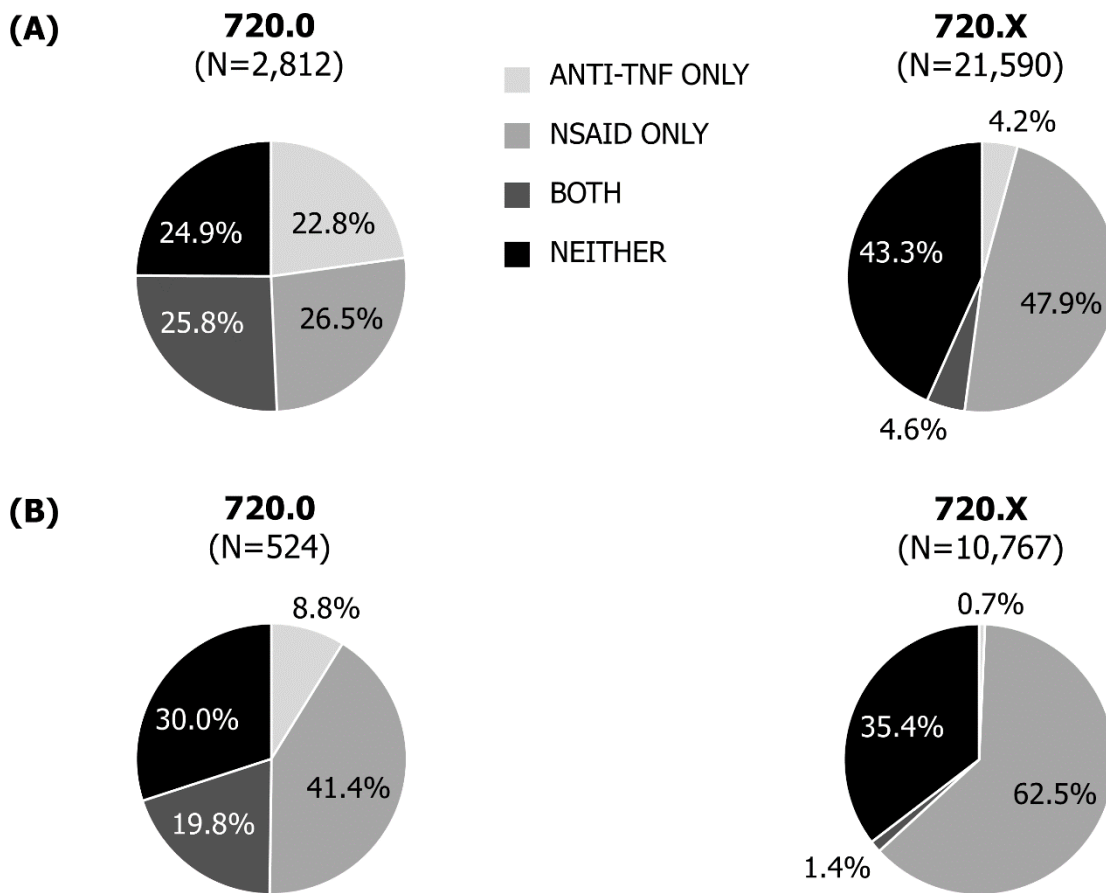

**Supplementary Table 3.** Baseline data for patients with Truven commercial claims (720.x cohort)

| <b>n (%), unless otherwise stated</b>            | <b>Total AS study population<br/>N=79,190</b> | <b>Patients WITH chronic opioid use<br/>N=21,590</b> | <b>Patients WITHOUT chronic opioid use<br/>N=57,600</b> | <b>P-value (chronic opioid vs. not)</b> |
|--------------------------------------------------|-----------------------------------------------|------------------------------------------------------|---------------------------------------------------------|-----------------------------------------|
| <b>Age</b>                                       |                                               |                                                      |                                                         | <0.0001                                 |
| Mean (SD)                                        | 47 (11.3)                                     | 49 (9.7)                                             | 46 (11.7)                                               |                                         |
| 18-24 years                                      | 3,796 (4.8)                                   | 312 (1.4)                                            | 3,484 (6.0)                                             |                                         |
| 25-34 years                                      | 8,701 (11.0)                                  | 1,611 (7.5)                                          | 7,090 (12.3)                                            |                                         |
| 35-44 years                                      | 17,577 (22.2)                                 | 4,481 (20.8)                                         | 13,096 (22.7)                                           |                                         |
| 45-54 years                                      | 24,636 (31.1)                                 | 7,364 (34.1)                                         | 17,272 (30.0)                                           |                                         |
| ≥55 years                                        | 24,480 (30.9)                                 | 7,822 (36.2)                                         | 16,658 (28.9)                                           |                                         |
| <b>Gender</b>                                    |                                               |                                                      |                                                         | <0.0001                                 |
| Female                                           | 50,631 (63.9)                                 | 14,464 (67.0)                                        | 36,167 (62.8)                                           |                                         |
| Male                                             | 28,559 (36.1)                                 | 7,126 (33.0)                                         | 21,433 (37.2)                                           |                                         |
| <b>Rheumatologist as provider on index claim</b> |                                               |                                                      |                                                         | <0.0001                                 |
| Yes                                              | 10,442 (13.2)                                 | 2,366 (11.0)                                         | 8,076 (14.0)                                            |                                         |
| <b>Comorbidities</b>                             |                                               |                                                      |                                                         |                                         |
| Depression                                       | 14,674 (18.5)                                 | 6,624 (30.7)                                         | 8,050 (14.0)                                            | <0.0001                                 |
| Anxiety                                          | 12,995 (16.4)                                 | 5,649 (26.2)                                         | 7,346 (12.8)                                            | <0.0001                                 |
| Rheumatoid arthritis                             | 2,415 (3.0)                                   | 1,074 (5.0)                                          | 1,341 (2.3)                                             | <0.0001                                 |
| Psoriatic arthritis                              | 1,109 (1.4)                                   | 367 (1.7)                                            | 742 (1.3)                                               | <0.0001                                 |
| Psoriasis                                        | 1,299 (1.6)                                   | 370 (1.7)                                            | 929 (1.6)                                               | 0.3195                                  |
| IBD                                              | 1,416 (1.8)                                   | 447 (2.1)                                            | 969 (1.7)                                               | 0.0002                                  |

|                            |             |             |           |         |
|----------------------------|-------------|-------------|-----------|---------|
| Opioid dependence or abuse | 2,125 (2.7) | 1,805 (8.4) | 320 (0.6) | <0.0001 |
|----------------------------|-------------|-------------|-----------|---------|

**Imaging or genotyping procedures**

|                 |               |               |               |         |
|-----------------|---------------|---------------|---------------|---------|
| MRI or X-Ray    | 33,892 (42.8) | 11,030 (51.1) | 21,421 (37.2) | <0.0001 |
| X-Ray           | 27,022 (34.1) | 8,183 (37.9)  | 18,034 (31.3) | <0.0001 |
| MRI             | 16,091 (20.3) | 7,493 (34.7)  | 9,486 (16.5)  | <0.0001 |
| HLA-B27 testing | 2,493 (3.1)   | 707 (3.3)     | 2,092 (3.6)   | 0.0153  |

---

AS: Ankylosing spondylitis; IBD: inflammatory bowel disease; MRI: magnetic resonance imaging;

SD: standard deviation.

**Supplementary Table 4.** Baseline data for patients with Truven Medicaid claims (720.x cohort)

| n (%), unless otherwise stated                   | Total AS study population<br>N=14,041 | Patients WITH chronic opioid use<br>N=10,767 | Patients WITHOUT chronic opioid use<br>N=3,274 | P-value<br>(chronic opioid vs. not) |
|--------------------------------------------------|---------------------------------------|----------------------------------------------|------------------------------------------------|-------------------------------------|
| <b>Age</b>                                       |                                       |                                              |                                                | <0.0001                             |
| Mean (SD)                                        | 45 (10.9)                             | 46 (10.3)                                    | 42 (12.0)                                      |                                     |
| 18-24 years                                      | 371 (2.6)                             | 130 (1.2)                                    | 241 (7.4)                                      |                                     |
| 25-34 years                                      | 2,341 (16.7)                          | 1,608 (14.9)                                 | 733 (22.4)                                     |                                     |
| 35-44 years                                      | 3,937 (28.0)                          | 3,031 (28.2)                                 | 906 (27.7)                                     |                                     |
| 45-54 years                                      | 4,280 (30.5)                          | 3,468 (32.2)                                 | 812 (24.8)                                     |                                     |
| ≥55 years                                        | 3,112 (22.2)                          | 2,530 (23.5)                                 | 582 (17.8)                                     |                                     |
| <b>Gender</b>                                    |                                       |                                              |                                                | 0.8643                              |
| Female                                           | 10,446 (74.4)                         | 8,014 (74.4)                                 | 2,432 (74.3)                                   |                                     |
| Male                                             | 3,595 (25.6)                          | 2,753 (25.6)                                 | 842 (25.7)                                     |                                     |
| <b>Rheumatologist as provider on index claim</b> |                                       |                                              |                                                |                                     |
| Yes                                              | 279 (2.0)                             | 132 (1.2)                                    | 147 (4.5)                                      | <0.0001                             |
| <b>Comorbidities</b>                             |                                       |                                              |                                                |                                     |
| Depression                                       | 6,991 (49.8)                          | 5,591 (51.9)                                 | 1,400 (42.8)                                   | <0.0001                             |
| Anxiety                                          | 6,374 (45.4)                          | 5,146 (47.8)                                 | 1,228 (37.5)                                   | <0.0001                             |
| Rheumatoid arthritis                             | 384 (2.7)                             | 305 (2.8)                                    | 79 (2.4)                                       | 0.1972                              |
| Psoriatic arthritis                              | 63 (0.4)                              | 38 (0.4)                                     | 25 (0.8)                                       | 0.0021                              |
| Psoriasis                                        | 135 (1.0)                             | 91 (0.8)                                     | 44 (1.3)                                       | 0.0104                              |
| IBD                                              | 188 (1.3)                             | 131 (1.2)                                    | 57 (1.7)                                       | 0.0223                              |



|                            |              |              |           |         |
|----------------------------|--------------|--------------|-----------|---------|
| Opioid dependence or abuse | 1,898 (13.5) | 1,701 (15.8) | 197 (6.0) | <0.0001 |
|----------------------------|--------------|--------------|-----------|---------|

**Imaging or genotyping procedures**

|                 |              |              |              |         |
|-----------------|--------------|--------------|--------------|---------|
| MRI or X-Ray    | 8,163 (58.1) | 6,341 (58.9) | 1,822 (55.7) | 0.0010  |
| X-Ray           | 6,601 (47.0) | 5,049 (46.9) | 1,552 (47.4) | 0.6083  |
| MRI             | 4,406 (31.4) | 3,523 (32.7) | 883 (27.0)   | <0.0001 |
| HLA-B27 testing | 246 (1.8)    | 150 (1.4)    | 96 (2.9)     | <0.0001 |

---

AS: Ankylosing spondylitis; IBD: inflammatory bowel disease; MRI: magnetic resonance imaging;

SD: standard deviation.
